# Supplementary material
Source: Springer Nature journal article supplement (https://www.springermedizin.de/resource/supplementary/12879_2014_3851_MOESM1_ESM.pdf/9446792)

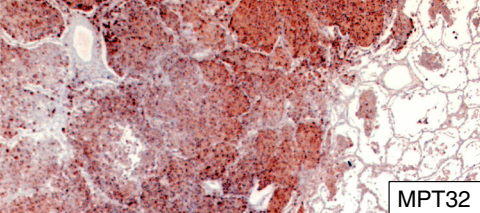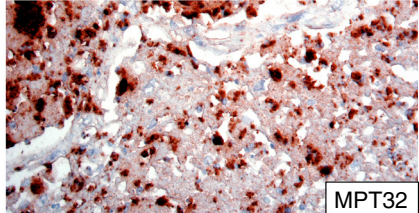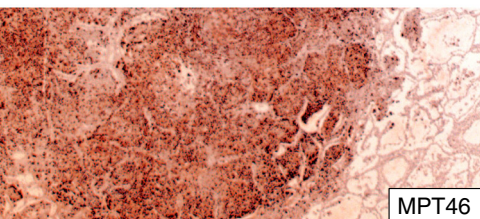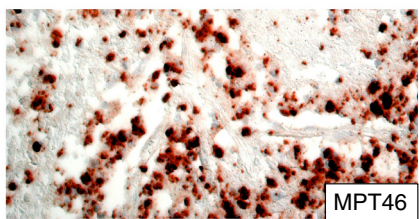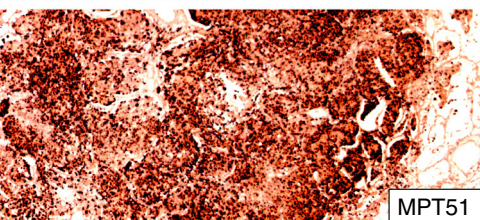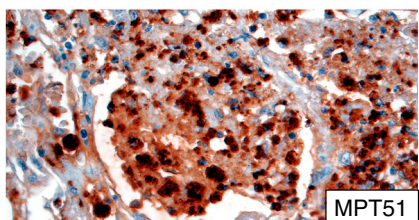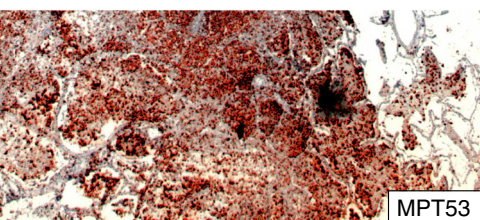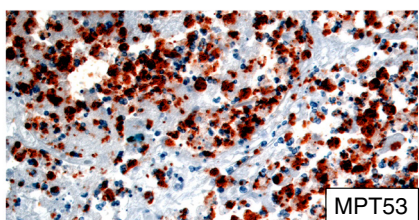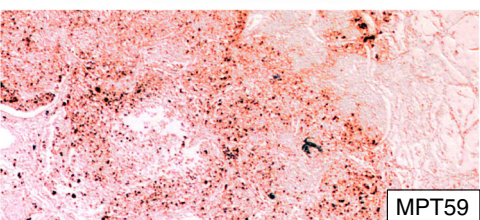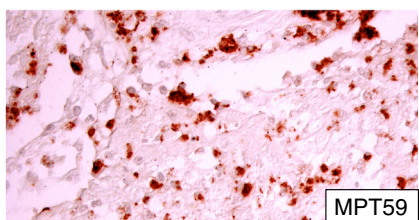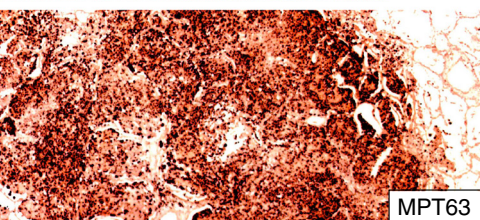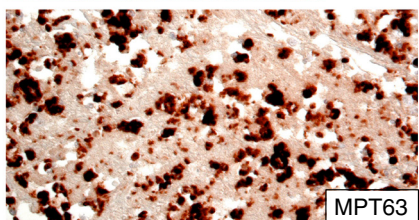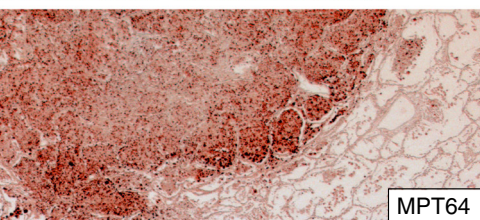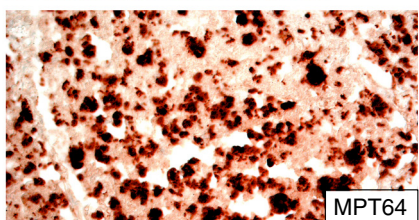

Supplement: MOESM1 [file 9446792]
